# Supplementary material
Source: publisher site journal article supplement (https://www.spandidos-publications.com/7651/downloadSupplementary)
Supplement: Supplementary file 1 [file downloadSupplementary]

## Sheet: Sheet1
Table SI. Differentially Expressed Genes Associated with TRP Channels.
Gene	Control mean	Treated mean	log fold change	P-value	Adjusted P-Value
TRPM6	0.420177777777778	0.324583433133733	-0.37241	7.49058346014687e-10	2.35418337318902e-09
ANLN	3.49246111111111	7.90809201596806	1.17908560671491	2.28151747108948e-11	8.36556406066143e-11
TRPM7	10.7305574074074	10.6406808383234	-0.0121346	0.00873212075536652	0.0147774351244664
TRPV1	1.83891851851852	4.44749041916168	1.27413394149265	1.34620914975914e-11	5.22645905200607e-11
TRPC1	4.4964537037037	3.96820698602794	-0.1803	0.000335079371872877	0.000631863958388854
TRPM8	0.0301037037037037	4.79335548902196	7.31495113327671	7.43649562903136e-26	2.45404355758035e-24
TRPA1	0.0982851851851852	0.628800399201597	2.67755625710665	7.27753891416973e-08	2.18326167425092e-07
TRPM3	0.0934388888888889	0.0739952095808383	-0.336591	1.04919143914044e-13	5.77055291527242e-13
CREG2	0.185737037037037	0.65107245508982	1.80955657805568	1.16583224985396e-07	3.34543167349397e-07
MCOLN1	35.6497722222222	17.9202972055888	-0.992298	2.59762305636493e-24	5.71477072400285e-23
PIRT	0.0280796296296296	0.142937125748503	2.34778487151117	0.0168157431808798	0.0277459762484517
CDCP1	0.0846648148148148	0.0227748502994012	-1.89432	1.0172867145546e-17	9.5915604515148e-17
TRPC6	18.9856851851852	14.6364073852295	-0.375351	6.03579623462697e-12	2.65575034323587e-11
PKD2	30.3439351851852	21.0107936127744	-0.530278	5.42673815452548e-10	1.79082359099341e-09
TCAF1	10.6361611111111	9.88519880239521	-0.105636	0.0175085499743257	0.0281844950806219
TCAF2	2.94075555555556	2.49894111776447	-0.23487	0.000130519219086548	0.000253360837050358
TRPC3	0.592648148148148	0.245761676646707	-1.26992	7.10949811978564e-21	7.8204479317642e-20
TRPC4	0.769596296296296	0.388030139720559	-0.987933	1.21204264074548e-11	4.99967589307510e-11
PKD2L1	2.78113703703704	1.20644810379242	-1.20491	7.20036684625775e-15	5.28026902058902e-14
RHOF	0.0117888888888889	0.524974051896208	5.47674646106209	2.20783782028266e-05	4.55366550433299e-05
TRPS1	3.59233888888889	6.22130279441118	0.792293269380791	0.026540868836803	0.0407371475169534
TYRP1	4.51414444444444	2.07802175648703	-1.11924	2.51654370225488e-14	1.50992622135293e-13
SCN4A	0.107494444444444	1.00460439121756	3.22429348117048	1.61569450441026e-06	3.94947545522508e-06
HCN2	0.333585185185185	1.71128103792415	2.35894958428669	2.95743638636993e-12	1.50146770384935e-11
PKD1L1	0.474431481481482	0.332544311377245	-0.512653	3.04523338359907e-06	6.93053114888064e-06
CACNA1C	2.47552407407407	1.49179161676647	-0.730688	1.0202352000717e-10	3.54397490551222e-10
CACNA1D	3.10831851851852	2.68643632734531	-0.210441	8.55905733785099e-06	1.82225091709086e-05
ASIC1	0.921859259259259	2.35091516966068	1.35060406620974	3.00292614660319e-07	7.62281252599271e-07
ZACN	0.056287037037037	0.510486826347305	3.18099911980297	4.76436709792675e-06	1.04816076154389e-05
CACNA1E	0.0257907407407407	0.183474650698603	2.83065563584967	5.93843031993277e-12	2.65575034323587e-11
KCNK9	0.0385592592592593	0.583635329341317	3.91991797478874	0.000714181165983119	0.00130933213763572
KCNK3	35.2646388888889	7.56023892215569	-2.22172	1.18977732764629e-26	7.85253036246551e-25
TRPV6	0.417181481481481	0.410316566866267	-0.0239377	2.93202170070859e-07	7.62281252599271e-07
KCNJ1	0.223431481481481	0.725070658682635	1.69828911791589	0.0214997031000845	0.0337852477287042
KCNQ3	2.40890555555556	10.7910449101796	2.16338483256792	2.07982032695654e-14	1.37268141579132e-13
ASIC5	0.0128185185185185	0.151735329341317	3.56525559569338	2.23651909029327e-07	6.15042749830649e-07
CLCNKB	1.2649462962963	1.61878582834331	0.355835987969293	0.00190194152228173	0.00330337211764722
CLCN7	20.3430555555556	28.7040738522954	0.49671911696857	1.69308335852894e-06	3.99083934510393e-06
PKD1L3	0.159455555555556	0.172663473053892	0.114808550023231	0.00114209394148478	0.00203724865237826
AQP1	1117.70920555556	399.054415169661	-1.48589	5.43933168343517e-22	8.97489727766803e-21
P2RX7	6.47794074074074	3.39154630738523	-0.933592	2.23517040921584e-16	1.84401558760307e-15
KCNN4	5.91361666666667	56.2514	3.24977649792914	4.32752549982726e-21	5.71233365977198e-20
CLIC1	558.317322222222	714.957863273453	0.356772900251872	4.98427952855421e-05	9.96855905710842e-05
